# Supplementary material for: Predictive value of integrated 18F-FDG PET/MRI in the early response to nivolumab in patients with previously treated non-small cell lung cancer
Source: PubMed Central journal article supplement (PMC7213911; doi:10.1136/jitc-2019-000349), 2020-04-28
Supplement: jitc-2019-000349supp001.pdf [file jitc-2019-000349supp001.pdf]

**Additional file 1****Table S1. Changes from baseline in CT and PET/MRI parameters according to confirmed treatment response**

|                                            | All subjects, N = 25 | Non-progressive disease,<br>N = 16 | Progressive disease,<br>N = 9 | P value <sup>a</sup> |
|--------------------------------------------|----------------------|------------------------------------|-------------------------------|----------------------|
| $\Delta$ diameter, %                       | 2.2 (-17.7–18.9)     | -1.5 (-17.7–18.9)                  | 4.1 (-9.4–16.9)               | 0.52                 |
| $\Delta$ SUV <sub>max</sub> , %            | 1.6 (-73.8–59.6)     | 1.7 (-73.8–59.6)                   | -1.1 (-17.9–48.9)             | 0.68                 |
| $\Delta$ SUL peak, %                       | 5.2 (-80.2–63.6)     | 3.7 (-80.2–34.5)                   | 5.2 (-17.7–63.6)              | 0.93                 |
| $\Delta$ TLG, %                            | 10.0 (-80.7–140.2)   | -1.0 (-80.7–41.3)                  | 23.1 (-8.5–140.2)             | 0.008                |
| $\Delta$ ADC <sub>mean</sub> , %           | -9.1 (-87.6–21.2)    | -17.1 (-87.6–8.4)                  | 2.4 (-13.1–21.2)              | 0.0006               |
| $\Delta$ TLG+ $\Delta$ ADC <sub>mean</sub> | -0.2 (-126.8–142.3)  | -15.9 (-126.8–49.7)                | 30.6 (-2.3–142.3)             | 0.0001               |

<sup>a</sup>P values compare the non-progressive and progressive disease groups.
