# Supplementary material for: Predictive value of integrated 18F-FDG PET/MRI in the early response to nivolumab in patients with previously treated non-small cell lung cancer
Source: PubMed Central journal article supplement (PMC7213911; doi:10.1136/jitc-2019-000349), 2020-04-28
Supplement: jitc-2019-000349supp002.pdf [file jitc-2019-000349supp002.pdf]

## Additional file 2

Figure S1.

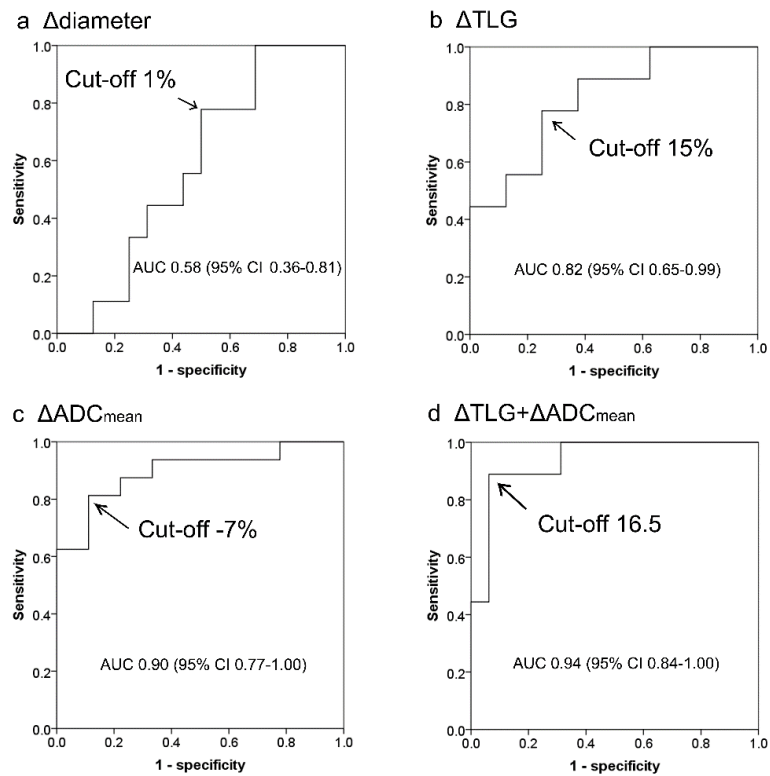

**Figure S1.** ROC curve analysis of  $^{18}\text{F}$ -FDG PET/MRI parameters. Curves were constructed to determine the ability of  $\Delta$ diameter (a),  $\Delta$ TLG (b),  $\Delta$ ADC<sub>mean</sub> (c), and  $\Delta$ TLG+ $\Delta$ ADC<sub>mean</sub> (d) to predict disease progression after nivolumab therapy. The optimal cut-off values were estimated to be (a) 1%, (b) 15%, (c) -7%, and (d) 16.5.
