# Supplementary material for: Predictive value of integrated 18F-FDG PET/MRI in the early response to nivolumab in patients with previously treated non-small cell lung cancer
Source: PubMed Central journal article supplement (PMC7213911; doi:10.1136/jitc-2019-000349), 2020-04-28
Supplement: jitc-2019-000349supp003.pdf [file jitc-2019-000349supp003.pdf]

## Additional file 3

Table S2 Power of serial CT and PET/MRI parameters to predict progressive disease

|                                            | Cut-off (%) | Sensitivity % (N) | Specificity % (N) | PPV % (N)    | NPV % (N)   | Accuracy % (N)            |
|--------------------------------------------|-------------|-------------------|-------------------|--------------|-------------|---------------------------|
| RECIST 1.1, $\Delta$ diameter              | 20          | 100 (16/16)       | 0.0 (0/9)         | 64.0 (16/25) | 0.0 (0/0)   | 64.0 (16/25)              |
| PERCIST, $\Delta$ SUL peak                 | 30          | 93.8 (15/16)      | 11.1 (1/9)        | 65.2 (15/23) | 50.0 (1/2)  | 64.0 (16/25)              |
| EORTC, $\Delta$ SUV <sub>max</sub>         | 25          | 81.3 (13/16)      | 11.1 (1/9)        | 61.9 (13/21) | 25.0 (1/4)  | 56.0 (14/25)              |
| $\Delta$ diameter                          | 1           | 50.0 (8/16)       | 77.8 (7/9)        | 80.0 (8/10)  | 46.7 (7/15) | 60.0 (15/25)              |
| $\Delta$ TLG                               | 15          | 75.0 (12/16)      | 77.8 (7/9)        | 85.7 (12/14) | 63.6 (7/11) | 76.0 (19/25)              |
| $\Delta$ ADC <sub>mean</sub>               | -7          | 81.3 (13/16)      | 88.9 (8/9)        | 92.9 (13/14) | 72.7 (8/11) | 84.0 (21/25)              |
| $\Delta$ TLG+ $\Delta$ ADC <sub>mean</sub> | 16.5        | 93.8 (15/16)      | 88.9 (8/9)        | 93.8 (15/16) | 88.9 (8/9)  | 92.0 (23/25) <sup>†</sup> |

RECIST, Response Evaluation Criteria in Solid Tumor; PERCIST, Positron Emission

Tomography Response Criteria in Solid Tumors; EORTC, European Organisation for the

Research and Treatment of Cancer; TLG, total lesion glycolysis; ADC<sub>mean</sub>, average apparent

diffusion coefficient; PPV, positive predictive value; NPV, negative predictive value

<sup>†</sup> $p = 0.027$  compared with  $\Delta$ diameter by McNemar's test.
