# Supplementary material for: Predictive value of integrated 18F-FDG PET/MRI in the early response to nivolumab in patients with previously treated non-small cell lung cancer
Source: PubMed Central journal article supplement (PMC7213911; doi:10.1136/jitc-2019-000349), 2020-04-28
Supplement: jitc-2019-000349supp004.pdf [file jitc-2019-000349supp004.pdf]

## Additional file 4

Figure S2.

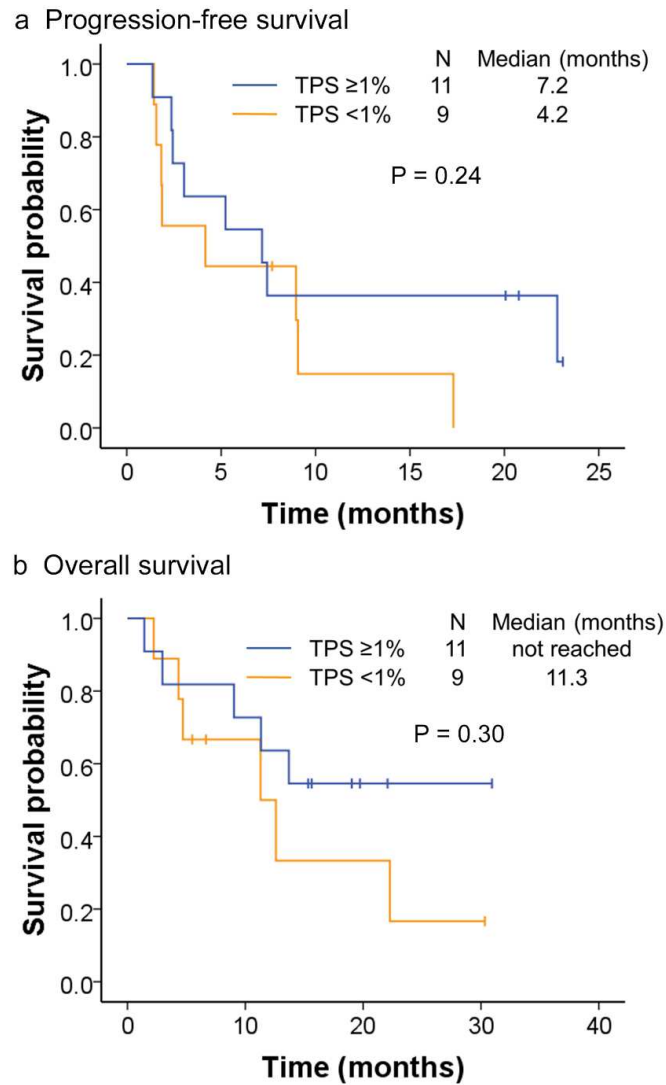

**Figure S2.** Kaplan–Meier curves of progression-free survival (a) and overall survival (b) of nivolumab-treated patients according to tumor PD-L1 expression.
